# Supplementary material
Source: Hindawi journal article supplement (doi:10.1155/2011/739847)
Supplement: f1 [file 739847.f1.pdf]

## Supplementary information to:

Evidence for Elevated Cerebrospinal Fluid ERK1/2 Levels in Alzheimer's Disease

Philipp Spitzer, Heinke Schieb, Heike Kamrowski-Kruck, Markus Otto, Davide Chiasserini, Lucilla Parnetti, Sanna-Kaisa Herukka, Johannes Schuchhardt, Jens Wiltfang, Hans-Wolfgang Klafki

### 1) Age and CSF levels of classical biomarkers tTau, pTau, and A $\beta$ 42 in the 4 diagnostic groups

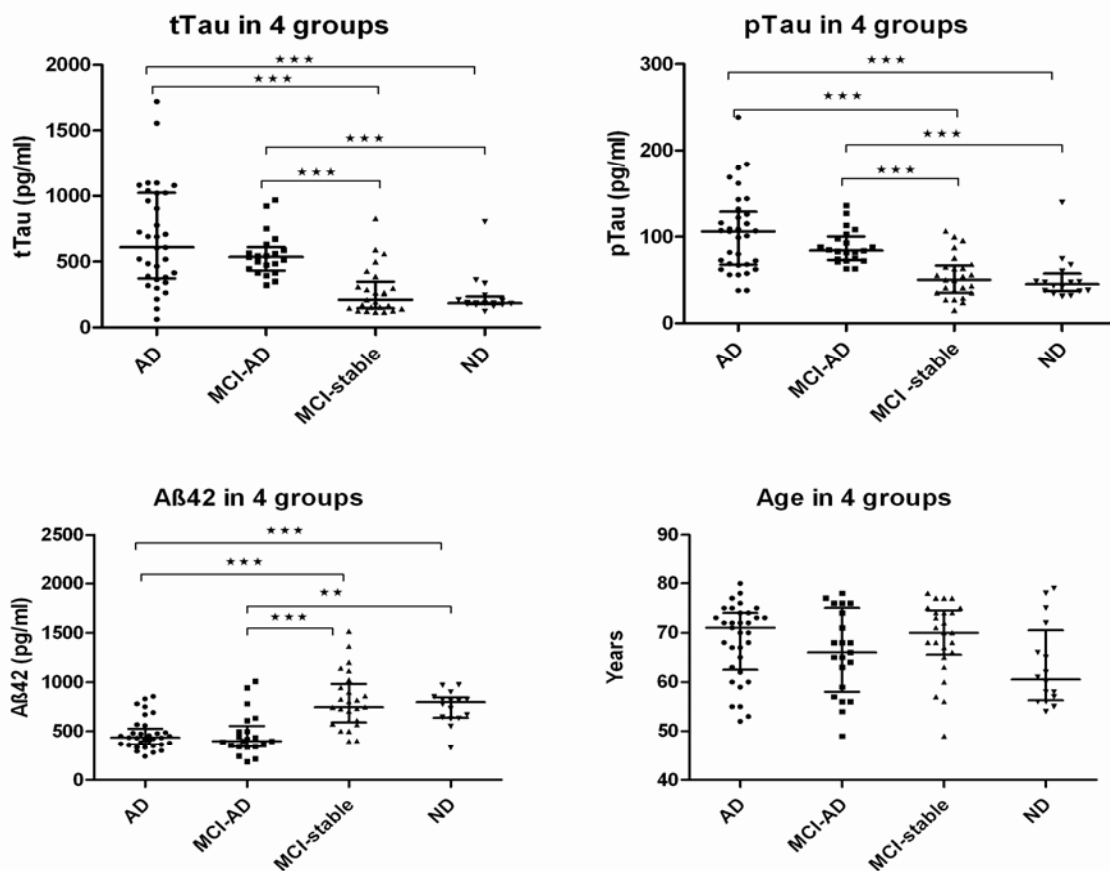

**Figure S1:** Age distribution and CSF levels of classical biomarkers tTau, pTau, and A $\beta$ 42: Non-parametric Kruskal-Wallis test followed by Dunn's multiple comparison test indicated significantly higher tTau and pTau levels (rank sums) in AD- and MCI-AD patients than in the MCI-stable and ND groups. CSF-A $\beta$ 42 (rank sums) was significantly lower in the AD and MCI-AD groups than in MCI-stable and ND groups (\*:  $p < 0.05$ ; \*\*:  $p < 0.01$ ; \*\*\*:  $p < 0.001$ ). Neither median nor mean ages differed significantly between the 4 groups ( $p = 0.1366$  with Kruskal-Wallis test and  $p = 0.0999$  with parametric ANOVA test). The bars indicate medians and interquartile ranges. The CSF levels of tTau, pTau and A $\beta$ 42 are shown here for comparative purposes. The actual measurements were performed within the context of other studies, and some of the data have been published before [1-4].

2) Table S1: Analysis for correlations between CSF-ERK1/2 and classical biomarkers for each center\*.

|                                      |            | tTau        | pTau        | A $\beta$ 42 | Age         |
|--------------------------------------|------------|-------------|-------------|--------------|-------------|
| <b>Perugia all<br/>(n=41)</b>        | Spearman r | 0.603       | 0.539       | -0.343       | 0.081       |
|                                      | p-value    | <0.0001     | 0.0003      | 0.028        | 0.613       |
| <b>Perugia AD<br/>(n=15)</b>         | Spearman r | 0.359       | 0.271       | -0.45        | -0.12       |
|                                      | p-value    | 0.189       | 0.328       | 0.092        | 0.670       |
| <b>Perugia MCI-AD<br/>(n=11)</b>     | Spearman r | 0.436       | -0.319      | -0.055       | 0.083       |
|                                      | p-value    | 0.18        | 0.339       | 0.873        | 0.809       |
| <b>Perugia MCI-stable<br/>(n=13)</b> | Spearman r | 0.460       | 0.460       | 0.363        | 0.036       |
|                                      | p-value    | 0.114       | 0.114       | 0.223        | 0.907       |
| <b>Perugia ND<br/>(n=2)</b>          |            | n too small | n too small | n too small  | n too small |
| <b>Kuopio all<br/>(n=45)</b>         | Spearman r | 0.245       | 0.244       | -0.520       | -0.178      |
|                                      | p-value    | 0.105       | 0.107       | 0.0002       | 0.242       |
| <b>Kuopio AD<br/>(n=17)</b>          | Spearman r | 0.123       | 0.100       | -0.544       | 0.058       |
|                                      | p-value    | 0.639       | 0.701       | 0.024        | 0.825       |
| <b>Kuopio MCI-AD<br/>(n=9)</b>       | Spearman r | 0.067       | 0.250       | -0.150       | 0.159       |
|                                      | p-value    | 0.880       | 0.521       | 0.708        | 0.678       |
| <b>Kuopio MCI-stable<br/>(n=7)</b>   | Spearman r | 0.357       | 0.357       | -0.071       | -0.487      |
|                                      | p-value    | 0.444       | 0.444       | 0.906        | 0.267       |
| <b>Kuopio ND<br/>(n=12)</b>          | Spearman r | -0.196      | -0.357      | 0.098        | -0.158      |
|                                      | p-value    | 0.542       | 0.255       | 0.762        | 0.625       |

\* Spearman correlation coefficients (r) and p-values (two-tailed) are indicated.  
ERK1/2 measurements below LLOD (n = 9) were excluded from the correlation analysis.

**References cited in the supplementary information:**

- [1] Herukka SK, Helisalmi S, Hallikainen M, Tervo S, Soininen H, Pirttila T (2007) CSF Abeta42, Tau and phosphorylated Tau, APOE epsilon4 allele and MCI type in progressive MCI. *Neurobiol Aging* **28**, 507-514.
- [2] Lanari A, Parnetti L (2009) Cerebrospinal fluid biomarkers and prediction of conversion in patients with mild cognitive impairment: 4-year follow-up in a routine clinical setting. *ScientificWorldJournal* **9**, 961-966.

- [3] Parnetti L, Lanari A, Silvestrelli G, Saggese E, Reboldi P (2006) Diagnosing prodromal Alzheimer's disease: role of CSF biochemical markers. *Mech Ageing Dev* **127**, 129-132.
- [4] Tapiola T, Alafuzoff I, Herukka SK, Parkkinen L, Hartikainen P, Soininen H, Pirttila T (2009) Cerebrospinal fluid {beta}-amyloid 42 and tau proteins as biomarkers of Alzheimer-type pathologic changes in the brain. *Arch Neurol* **66**, 382-389.
